# Supplementary figures and images for: A synthetic planar cell polarity system reveals localized feedback on Fat4-Ds1 complexes
Source: eLife journal article supplement (doi:10.7554/elife.24820), 2017-08-18

Figure 2 - figure supplement 1

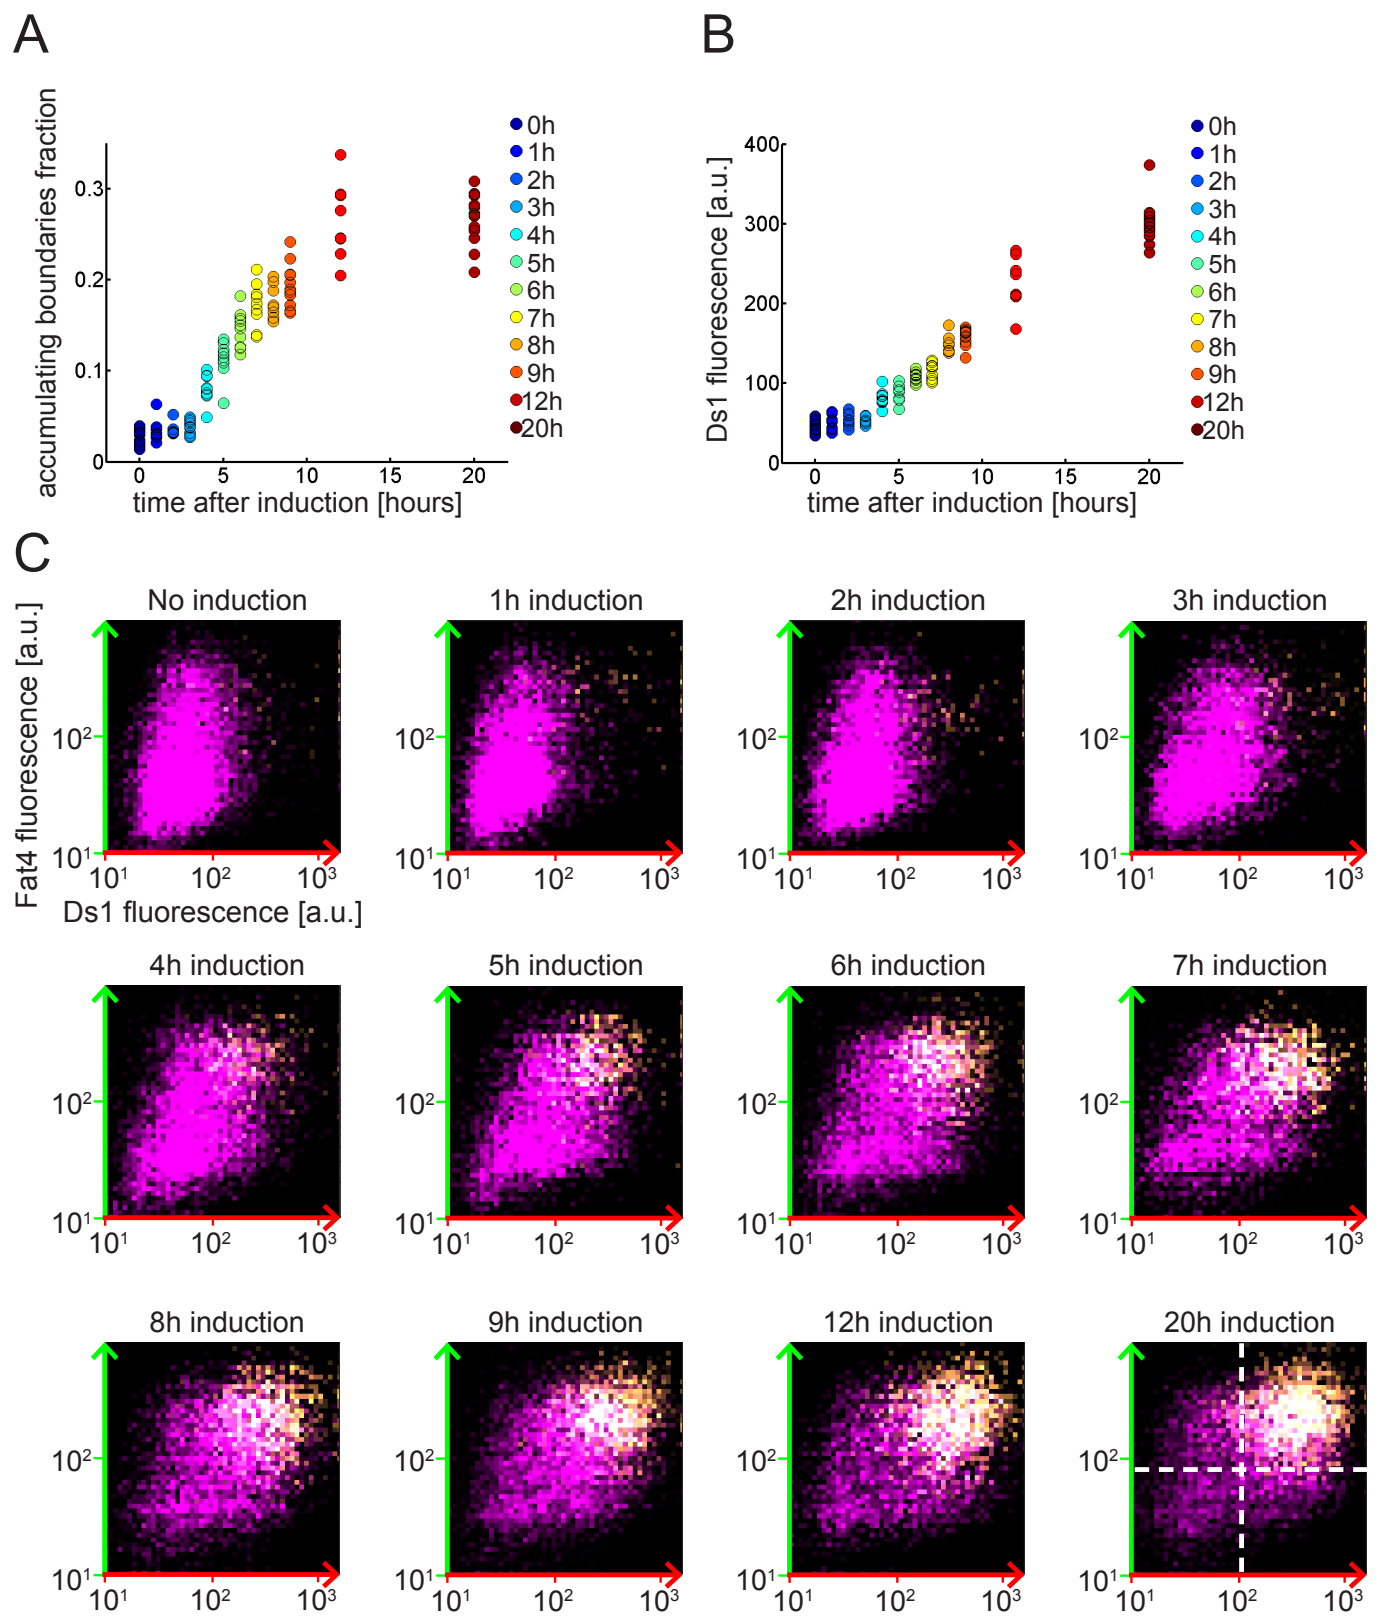

Supplement: supp [file elife_poa_e24820_Figure_1_Figure_Supplement_1.pdf › elife_poa_e24820_Figure_1_Figure_Supplement_1.pdf]

Figure 3 - figure supplement 1

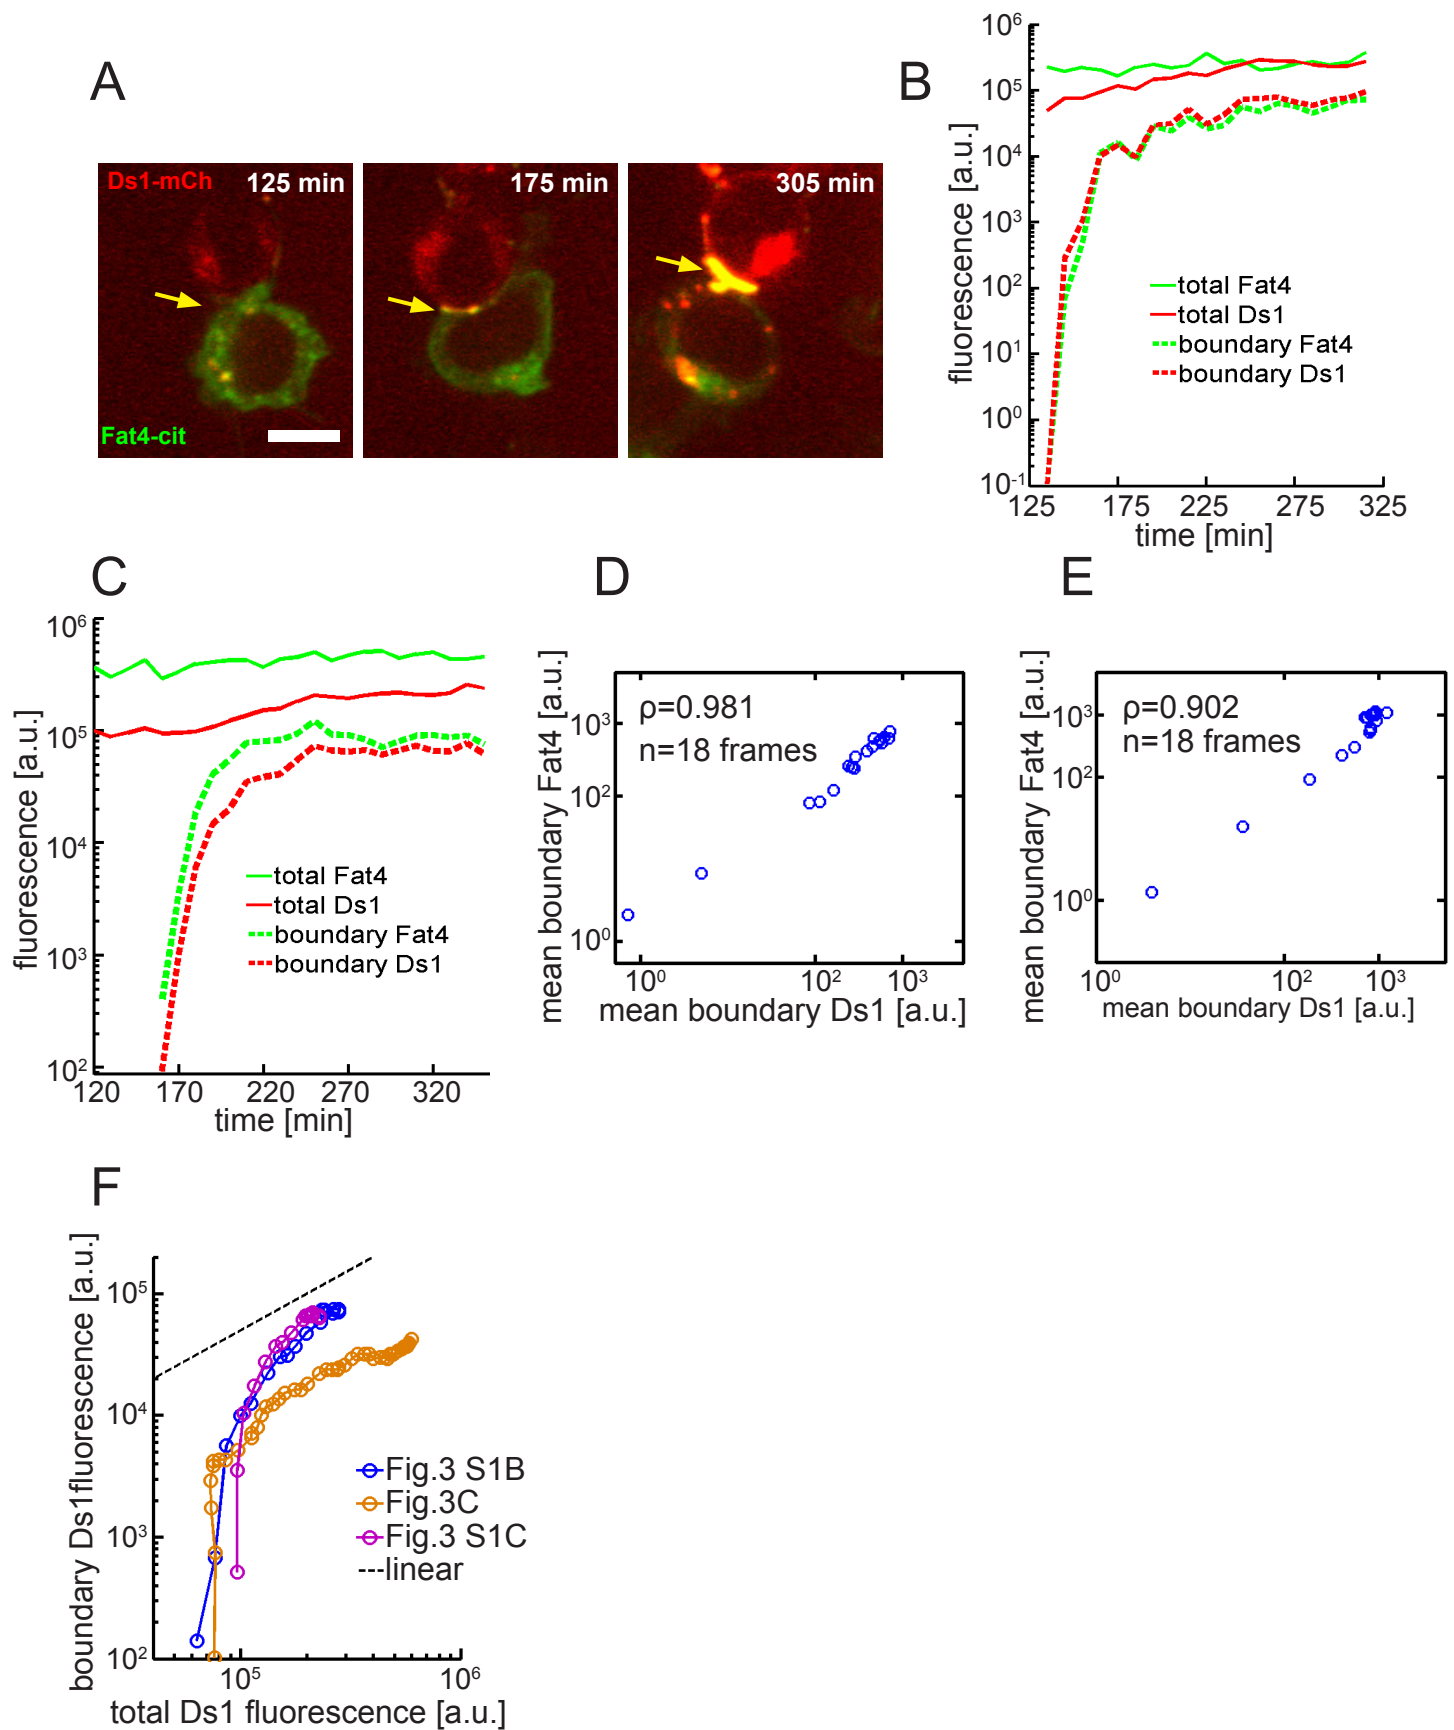

Supplement: supp [file elife_poa_e24820_Figure_3_Figure_Supplement_1.pdf › elife_poa_e24820_Figure_3_Figure_Supplement_1.pdf]

Figure 3 - figure supplement 2

A

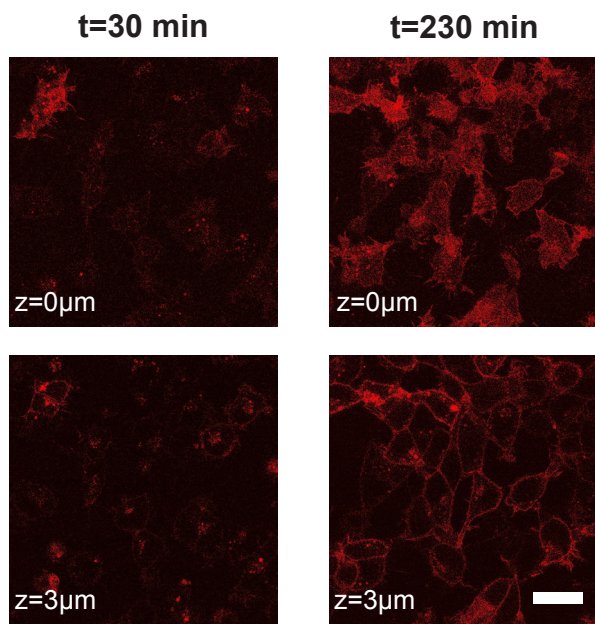

B

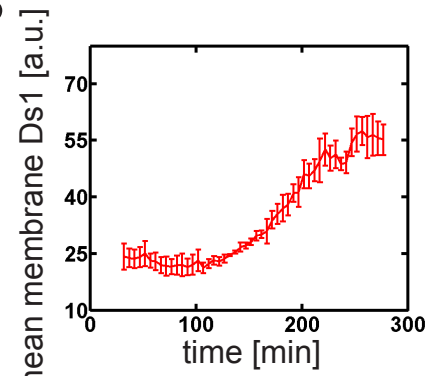

C

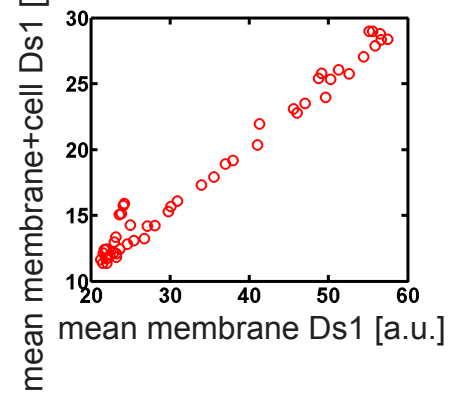

D

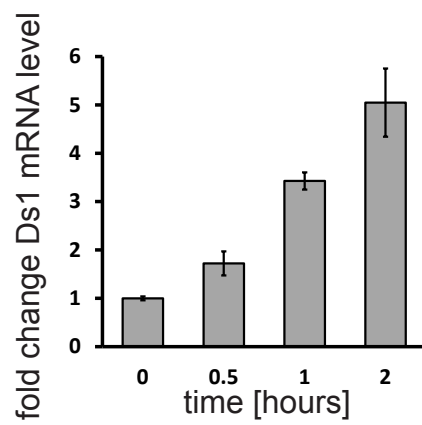

Supplement: supp [file elife_poa_e24820_Figure_3_Figure_Supplement_2.pdf › elife_poa_e24820_Figure_3_Figure_Supplement_2.pdf]

Figure 4 - figure supplement 1

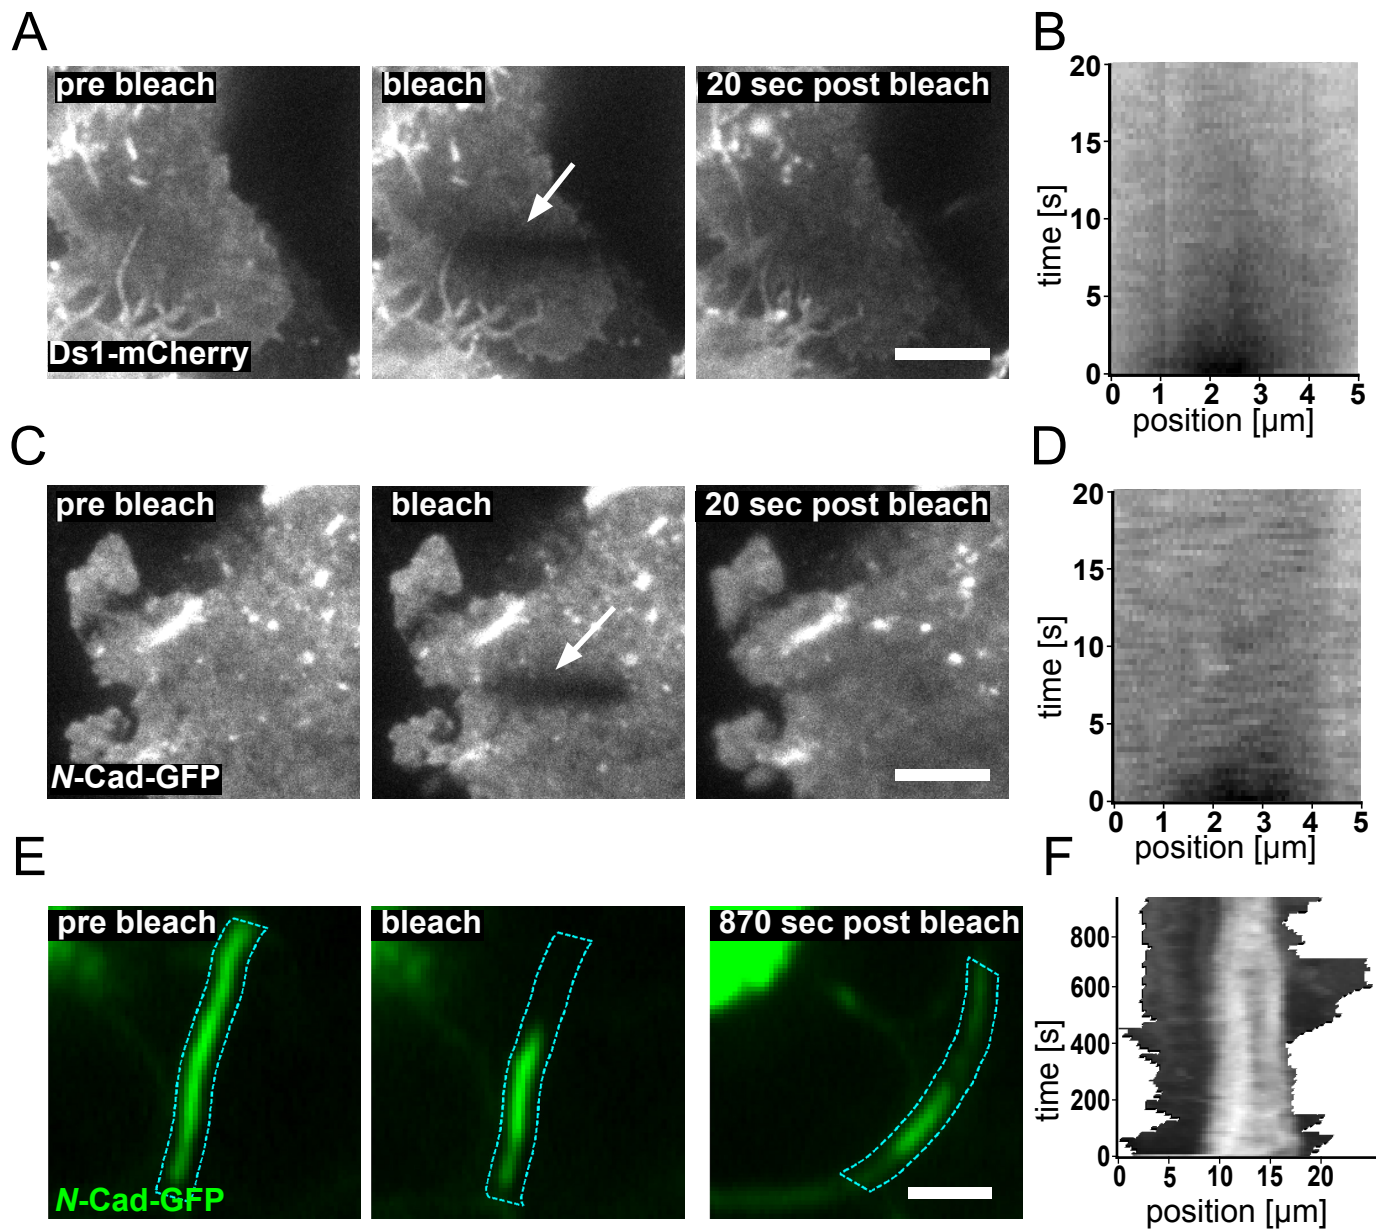

Supplement: supp [file elife_poa_e24820_Figure_4_Figure_Supplement_1.pdf › elife_poa_e24820_Figure_4_Figure_Supplement_1.pdf]

Figure 5 - figure supplement 1

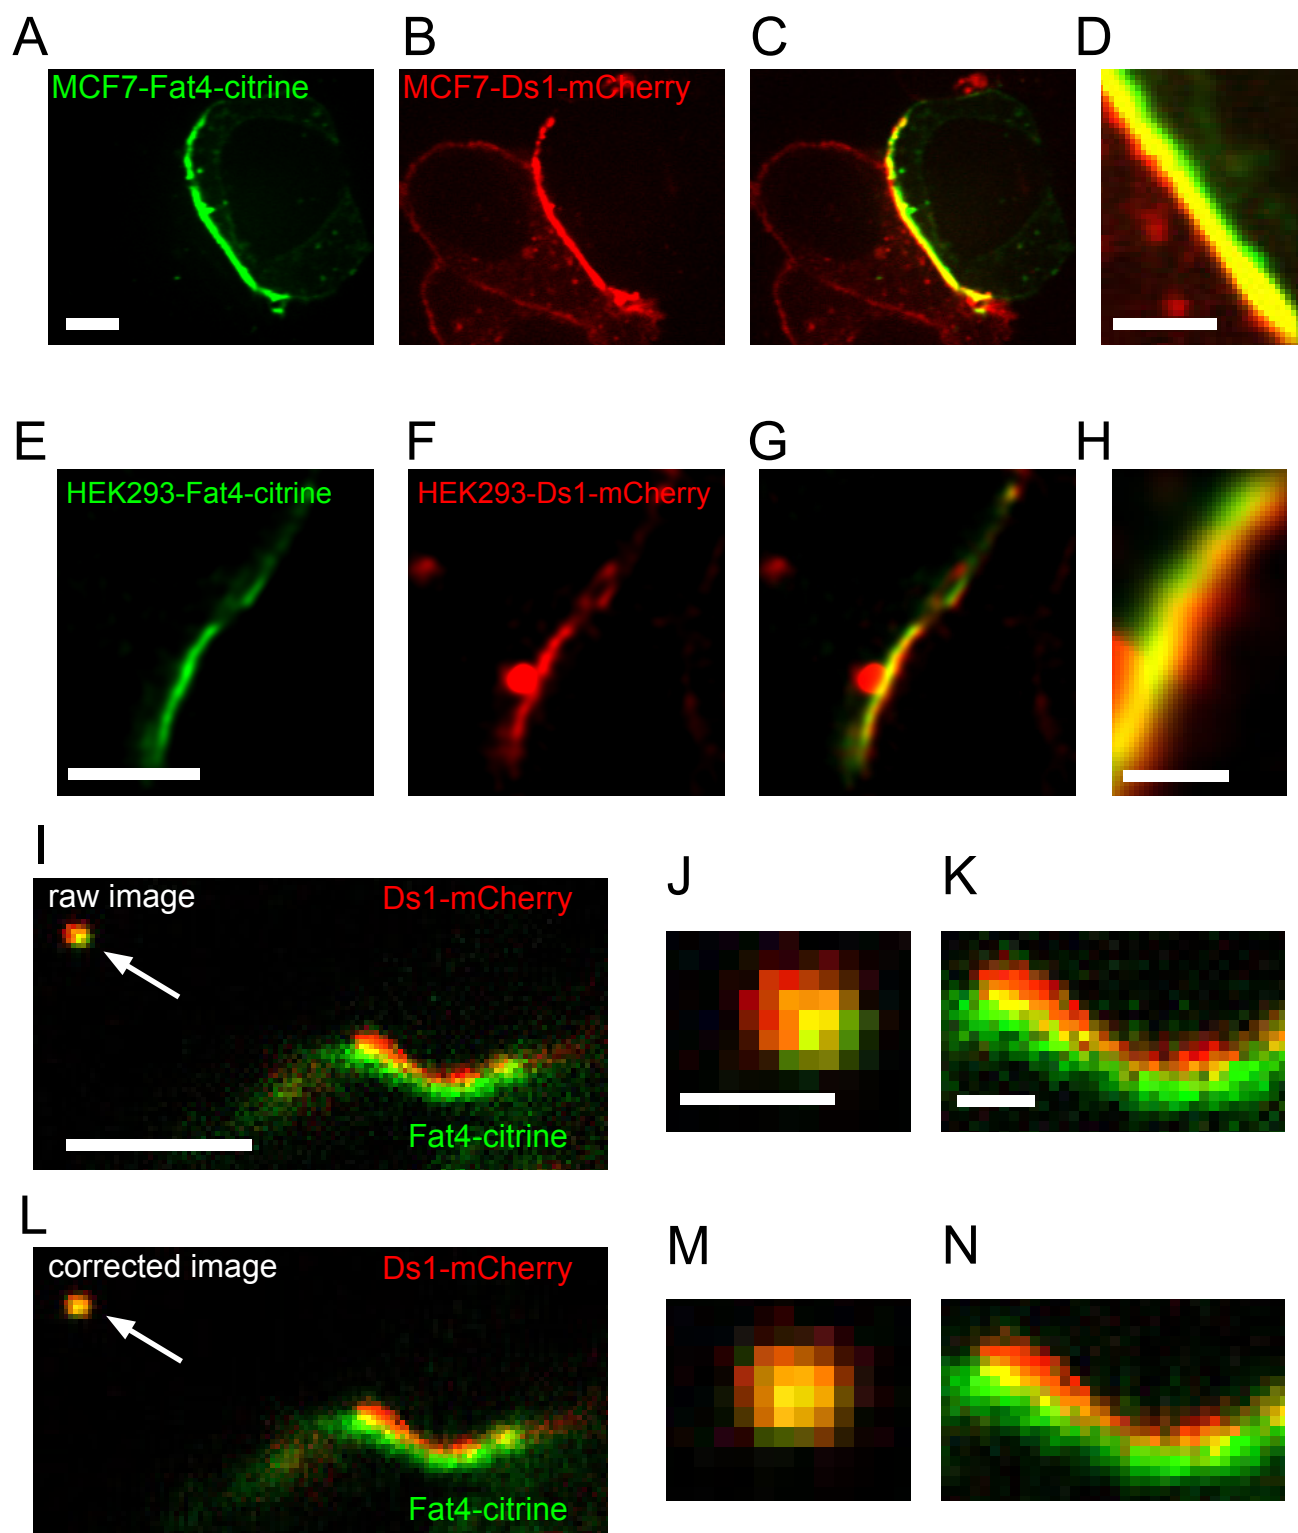

Supplement: supp [file elife_poa_e24820_Figure_5_Figure_Supplement_1.pdf › elife_poa_e24820_Figure_5_Figure_Supplement_1.pdf]

Figure 2 - figure supplement 2

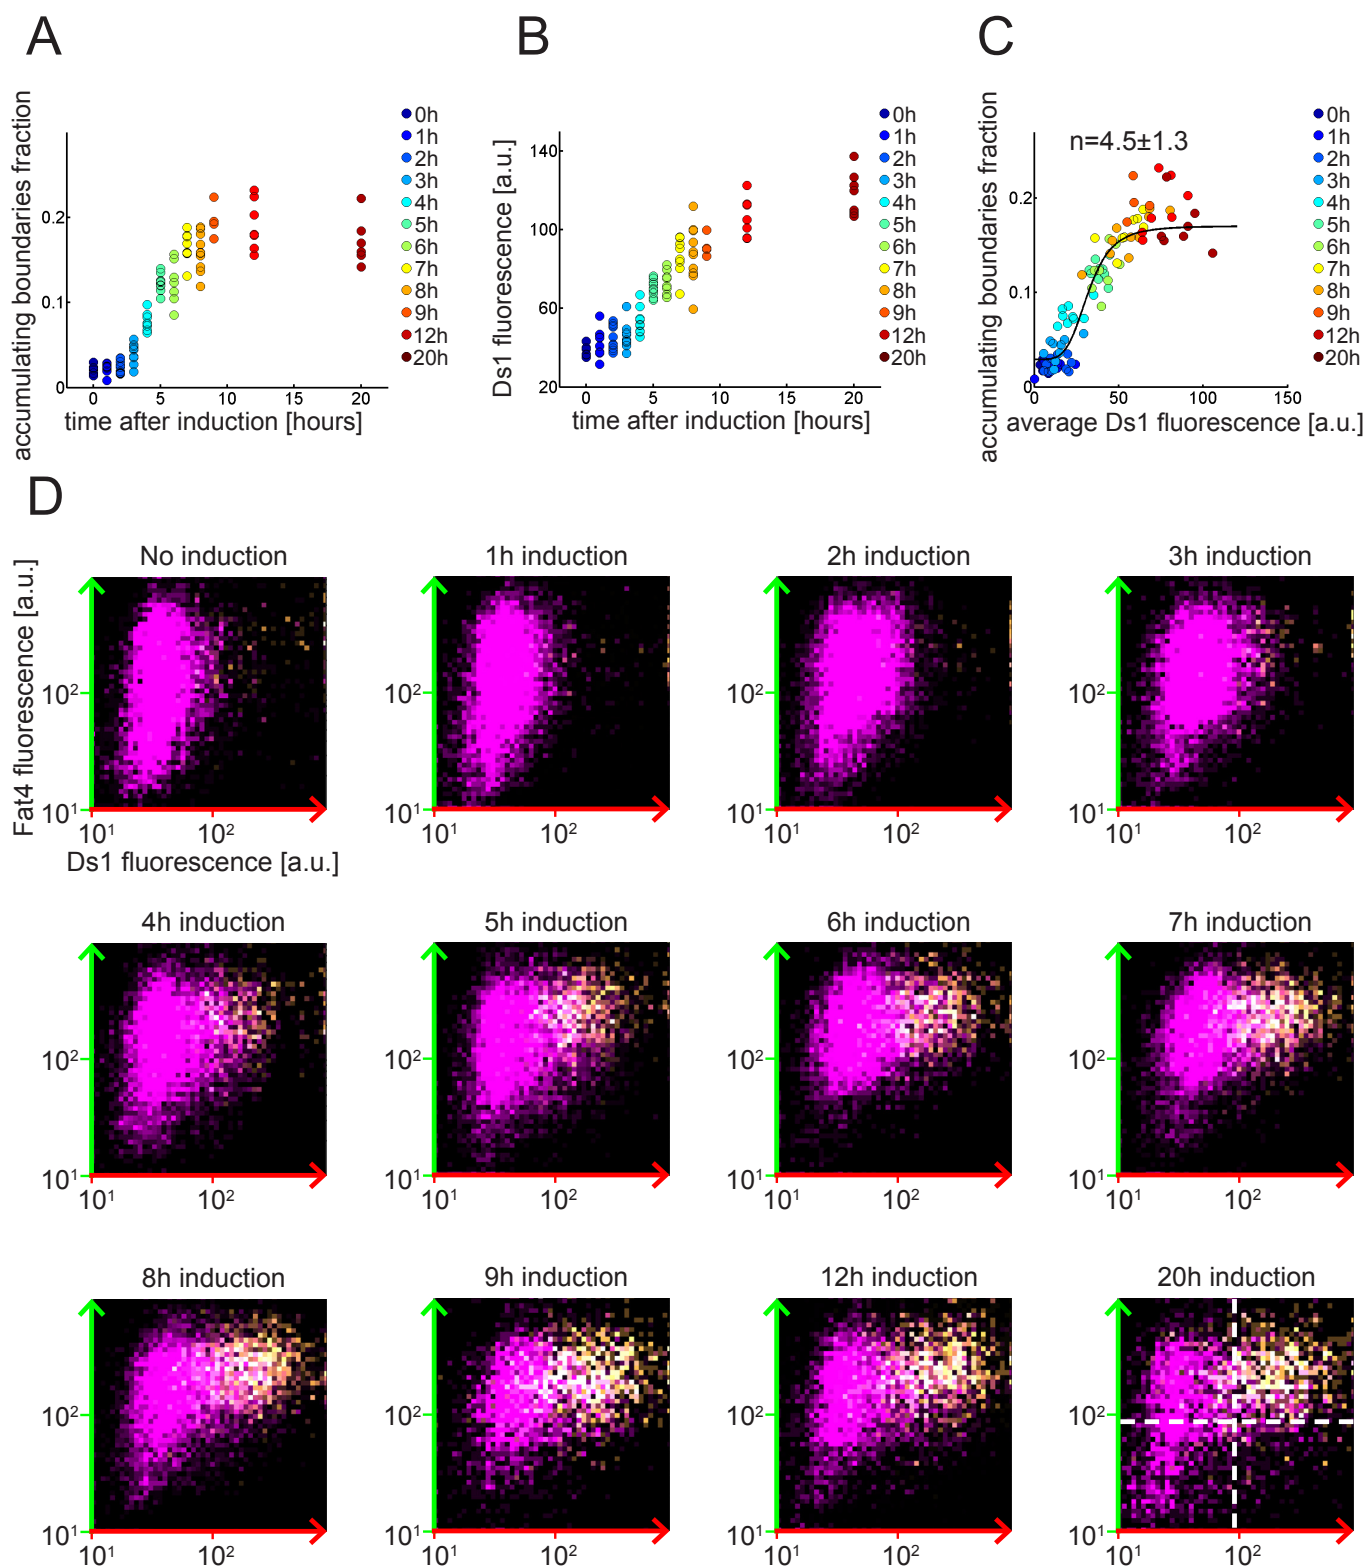

Supplement: supp [file elife_poa_e24820_Figure_5_Figure_Supplement_2.pdf › elife_poa_e24820_Figure_5_Figure_Supplement_2.pdf]

Figure 6 - figure supplement 1

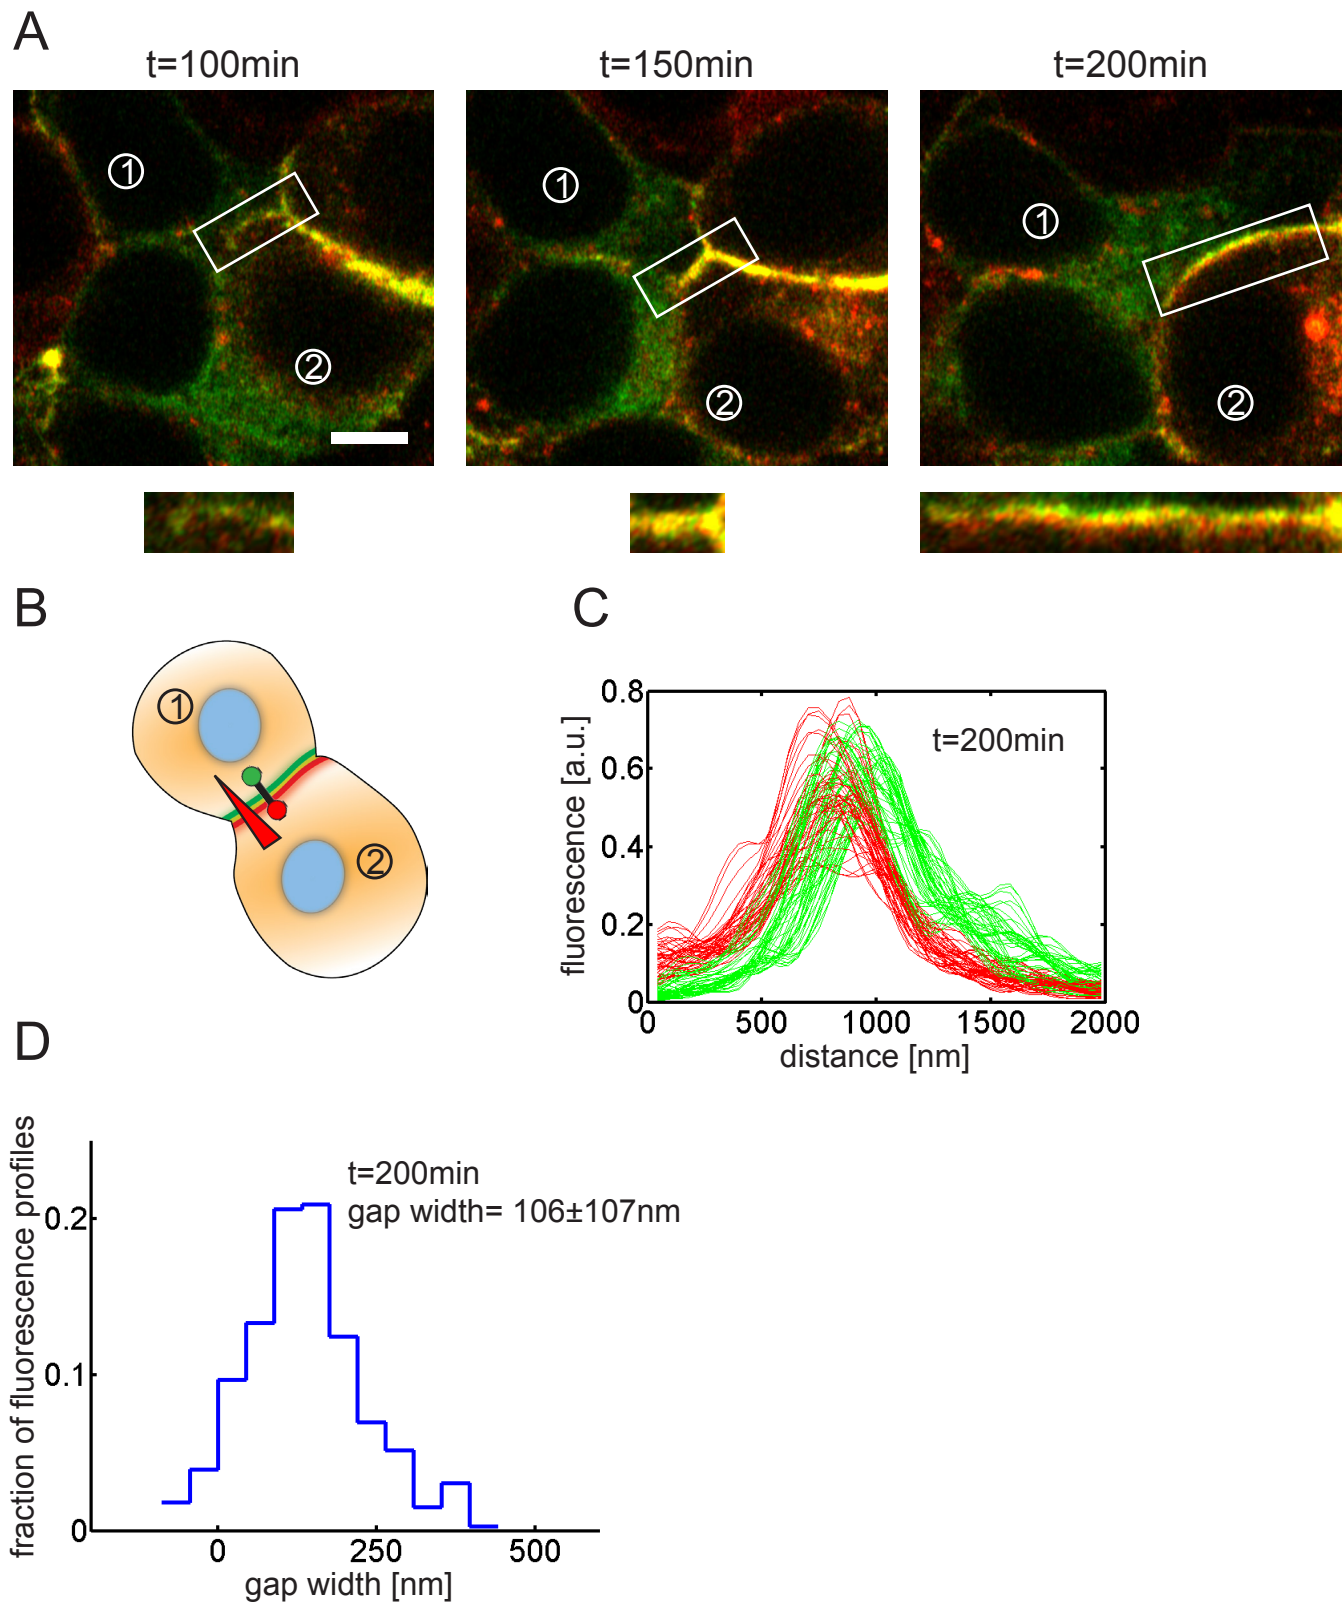

Supplement: supp [file elife_poa_e24820_Figure_6_Figure_Supplement_1.pdf › elife_poa_e24820_Figure_6_Figure_Supplement_1.pdf]
